# Supplementary material for: CD26 is a potential therapeutic target by humanized monoclonal antibody for the treatment of multiple myeloma
Source: PubMed Central journal article supplement (PMC6197267; doi:10.1038/s41408-018-0127-y), 2018-10-22
Supplement: 41408_2018_127_MOESM1_ESM.pdf [file 41408_2018_127_MOESM1_ESM.pdf]

1 **Supplementary Information**

2

3 **Supplementary Materials and Methods**

4 **Bone resorption assay**

5 Human OC culture was performed on fluoresceinated calcium-coated 24-well plates. On  
6 day 14 of culture, human OC functions were assayed through measuring phosphate  
7 substrate resorptive activity by quantifying fluorescence intensity in the conditioned  
8 medium using a bone resorption assay kit, as described in the manufacturer's protocol<sup>29</sup>.  
9 (PG research, Tokyo, Japan).

10

11 **Flow cytometry**

12 MM cell lines were collected and stained with anti-human CD26-Fluorescein (R&D  
13 systems, Minneapolis, MN, USA) or CD49d-FITC (Biolegend, San Diego, CA, USA).  
14 Acquisition was performed with an EPICS XL-MCL™ (Beckman Coulter, Indianapolis,  
15 IN, USA), as described previously<sup>29</sup>. The data were analyzed using FlowJo software (Tree  
16 Star, Ashland, OR, USA).

17

18 **Immunohistochemistry and enzyme-histochemistry**

19 For histology, the sections were stained with hematoxylin eosin. For  
20 immunohistochemistry, the sections were washed in PBS, subjected to antigen retrieval

21 for CD26 staining by autoclaving at 120°C for 20 minutes in 0.01 M sodium citrate  
22 (pH6.0) and exposed to 3% H<sub>2</sub>O<sub>2</sub> for 10 minutes to inactivate endogenous peroxidase.  
23 Cytospin slides of viable MM cells (40,000 cells / slides) were fixed with 4%  
24 paraformaldehyde (PFA) for 15 minutes. The tissue sections were incubated with  
25 following antibodies at room temperature: primary antibodies, goat anti-human CD26  
26 polyclonal antibody (for 2 hours) (R&D systems), CD138 antibody (for 1 hour) (Santa  
27 Cruz Biotechnology, Dallas, TX, USA) and tartrate resistant acid phosphatase (TRAP)  
28 antibody (for 1 hour) (Biolegend, San Diego, CA, USA) and secondary antibodies:  
29 polyclonal rabbit anti-mouse IgG<sub>1</sub> and polyclonal rabbit anti-goat IgG<sub>1</sub> (Sigma Aldrich).  
30 The reaction was visualized with 3,3'-diaminobezidine (DAB) (Dojindo, Laboratories,  
31 Kumamoto, Japan) and the tissue sections were counterstained for nucleus with  
32 hematoxylin. Hoechst 33342 (5 µg/ml) was added to the sections with secondary antibody  
33 and mounted with Vectorshield Hardset (Life Sciences, Burlingame, CA, USA) for  
34 immunofluorescence staining. To examine OCs, TRAP enzyme-histochemistry was  
35 performed by staining OCs originated from MM-derived BM-MNCs using 0.5 M L (+)  
36 tartrate acid, 2.0 M sodium acetate trihydrate and Histofine Sample Stain Kit (Nichirei  
37 Biosciences, Tokyo, Japan), as described and modified<sup>29</sup>. A Zeiss microscope  
38 (Copenhagen, Germany) was used to observe immunostaining and images were  
39 processed using Nanozoomer-XR (Hamamatsu photonics, Hamamatus, Japan).

40

41 **Western blot analysis**

42 The MM cells were collected and lysed in ice-cold lysis buffer, supplemented with 1 mM  
43 phenylmethylsulfonyl fluoride and proteasome inhibitor cocktail solution (Sigma  
44 Aldrich). The cell lysates were separated by sodium dodecyl sulfate polyacrylamide gel  
45 electrophoresis (SDS-PAGE) on a 7.5% polyacrylamide gel and transferred to PVDF  
46 membranes (Millipore, Billerica, MA, USA). The membranes were blocked with 3%  
47 skim-milk in Tris-buffered saline with 0.01% Tween for 1 hour at room temperature and  
48 incubated for 24 hours at 4°C with primary antibodies. After washing, the secondary  
49 horseradish peroxidase-conjugated antibody was added. The membranes were incubated  
50 using ECL immunoblotting detection reagents (GE Healthcare, Amersham, PI, UK)  
51 followed by exposure to hyperfilm (GE Healthcare), as described previously<sup>29</sup>. Goat anti-  
52 human CD26/DPPIV (R&D systems) was used as the primary antibody.  $\beta$ -actin was used  
53 as a benchmarker for total proteins. Horseradish peroxidase-conjugated goat anti-rabbit  
54 IgG-HRP (Cell Signaling Technology, Danvers, MA, USA) and horseradish peroxidase-  
55 conjugated anti-mouse IgG-HRP (Cell Signaling Technology) were used as secondary  
56 antibodies.

57

58 **Enzyme-linked immunosorbent assay (ELISA)**

59 CD26/DPPIV levels in the supernatants from MM cell culture or OC culture were  
60 quantitatively measured by sandwich ELISA kit (RayBio, Norcross, GA, USA) according

61 to the manufacturer's instructions. Briefly, each standard and test samples were incubated  
62 in plates coated with CD26/DPPIV as a capture antibody. After incubation for 2.5 hours,  
63 biotinylated anti-human CD26/DPPIV was added as the detection antibody for 1 hour at  
64 room temperature and subsequently HRP-streptavidin was added for 45 minutes. Next,  
65 TMB substrate reagents were added for 30 minutes, and the reactions were halted with  
66 stop solution. Thereafter, CD26/DPPIV concentration in the samples was determined at  
67 450 nm with GloMax-Multi Detection System (Promega, Madison, WI, USA).

68

#### 69 **Gene expression analysis**

70 Total RNA was extracted from MM cell lines (U266, KMS18, KMS26, KMS27 and  
71 KMS28) using an RNeasy Micro Kit (Qiagen, Valencia, CA, USA) according to the  
72 manufacturer's protocol. Complementary DNA (cDNA) was synthesized from 1µg of  
73 total RNA with oligo (dT)<sub>12-18</sub> primers using Superscript III First-Strand Synthesis System  
74 Kit (Life Technologies). Genes were further confirmed by real-time quantitative RT-PCR  
75 using specific primers (Thermo Fisher Scientific, Waltham, MA, USA) and SYBR  
76 Premix Ex Taq II (Takara Bio, Shiga, Japan) with analysis using the Thermal Cycler Dice  
77 (Takara Bio) according to standard PCR conditions. Specific primers were used for  
78 CD138, CD26, TRAP, β actin. The sequences of the primers used were as follows.  
79 human CD138, Forward; 5'-GGCTGTAGTCCTGCCAGAAG-3' and Reverse; 5'-  
80 GTTGAGGCCTGATGAGTGGT-3'(NM\_001006946), human CD26, Forward; 5'-

81 ATGGAATAACTGACTGGGTTTATGA-3', and Reverse; 5'-  
82 TGTACAGTCTTTCTTATCTTTTCGGG-3'(NM\_001935), human TRAP, Forward 5'-  
83 ACAGCCCCCACTCCCACCCT -3'and Reverse 5'-  
84 TCAGGGTCTGGGTCTCCTTGG-3'(NM\_001611), human  $\beta$ -actin, Forward; 5'-  
85 GTGGGCCGCTCTAGGCACCA-3' and Reverse; 5'-  
86 CTCTTTGATGTCACGCACGATTTC-3'(NM\_001101). The relative expression level  
87 of selected genes was calculated as follows: selected gene expression level/  $\beta$  -actin  
88 expression level for each sample.

89

#### 90 **Cell viability assay**

91 The MM cell lines ( $1 \times 10^6$  cells/ml in OC medium) were co-cultured with OCs or cultured  
92 alone in 24-well plates (1 ml/well) for 72 hours. The cells were treated with isotype (iso)  
93 control IgG<sub>1</sub> (Biolegend) or the indicated concentrations of huCD26mAb (0.1, 1.0, 10,  
94 50, or 100  $\mu$ g/ml) for 48 hours. At the end of each experiment, the MM cells were  
95 collected, cell viability was assessed by trypan blue staining, and survival was determined  
96 by cell-counting 8 assay (Dojindo) according to the manufacturer's instructions. The  
97 absorbance of each well was measured at 450 nm with GloMax-Multi Detection System  
98 (Promega).

99

#### 100 **ADCC assay**

101 MM target cells ( $1 \times 10^6$ /ml) were labeled with 10  $\mu$ mol/l of calcein-AM (Dojindo),  
102 incubated at 37°C for 30 minutes and washed 3 times with PBS. Subsequently, the cells  
103 were dispensed in wells and pre-incubated with iso control IgG<sub>1</sub> or indicated  
104 concentrations of huCD26mAb (0.0001, 0.001, 0.01, 0.1, 1.0, or 10  $\mu$ g/ml) at 37°C for 30  
105 minutes. The human NK effector cells were added to each well at the indicated effector  
106 to target (E/T) ratio (0.1, 1.0, 5.0, 10, 25, or 50) and incubated at 37°C for 4 hours.  
107 Thereafter, culture supernatants were transferred to black 96-well plates in triplicate, and  
108 calcein-AM release was measured with microplate reader. RPMI1640 was added instead  
109 of huCD26mAb to determine the spontaneous calcein-AM release, with Triton X-100  
110 (1%) added to determine the maximal calcein-AM release. The % specific  
111 lysis =  $100 \times (\text{OD mean experimental release} - \text{OD mean spontaneous release}) / (\text{OD mean}$   
112  $\text{maximal release} - \text{OD mean spontaneous release})$ .

113

#### 114 **Complement-dependent cellular (CDC) assay**

115 Calcein-AM-labelled MM target cells were incubated with iso control IgG<sub>1</sub> as a negative  
116 control, LEAF™ purified anti-human HLA-DR (Biolegend) as a positive control or  
117 indicated concentrations of huCD26mAb (0.0001, 0.001, 0.01, 0.1, 1.0, or 10  $\mu$ g/ml) in  
118 the presence of 50% human serum as a source of complement at 37°C for 1 hour. Calcein-  
119 AM release from the supernatants was measured in triplicate.

120

121 **Cell adhesion assay**

122 MM cells ( $5 \times 10^6$ /ml) were labeled with 10  $\mu$ mol/l of calcein-AM for 30 minutes at 37°C.  
123 Then, cells were washed 3 times and resuspended with RPMI1640. The cells were added  
124 to BMSC-coated 24-well plates in the presence of iso IgG<sub>1</sub> or huCD26mAb (0.1, 1.0, 10  
125  $\mu$ g/ml) at 37°C for 4 hours. Non-adherent cells were detached and removed by washing  
126 with RPMI1640 3 times. The absorbance of each well was measured using a 492/520 nm  
127 filter with a fluorescence plate reader.

128

129 ***In vivo* anti-MM therapy with huCD26mAb**

130 Initially, CD26<sup>+</sup> KMS18 cells ( $5 \times 10^6$ ), co-cultured with OCs in their logarithmic growth  
131 phase were subcutaneously (s.c.) inoculated into the left flank of mice. 10 to 14 days after  
132 the inoculation of KMS18 cells, when tumors were established (approximately 5 mm in  
133 size) at the injection site, the mice were randomized into 2 groups. The mice were  
134 intraperitoneally (i.p.) treated with either PBS (control) (n=5) or huCD26mAb (10  
135 mg/kg/dose) (n=5) in 100  $\mu$ l of PBS, i.p. 3 times a week for 2 weeks for a total of 6 doses.  
136 After 2 weeks of the treatment, the mice were sacrificed, and the tumor sizes and weights  
137 were measured. Next, to assess the effect of huCD26mAb on both tumor burden and  
138 osteolysis within human BM, human bone grafts were subcutaneously implanted into the  
139 6-week female NOD/SCID mice. 4 weeks after bone implantation, when BM engraftment  
140 was confirmed, KMS18 cells ( $5 \times 10^6$ ) cultured alone were directly injected into human

141 bone implant. After 4 weeks, the mice were randomized into 2 groups, randomly assigned  
142 to be treated with either PBS (control) (n=5) or huCD26mAb (10 mg/kg/dose) (n=5) i.p.,  
143 3 times a week for 4 weeks, a total of 12 doses. After the completion of treatment (day  
144 15 in the NOD/SCID MM model or day 29 in the NOD/SCID-hu MM model), the  
145 implanted human bones were collected, fixed in 4% PFA and decalcified with 10% EDTA.  
146 The specimens were processed and embedded in paraffin and sectioned for histology and  
147 immunohistochemistry analysis with CD26 and TRAP.

148 During the observation period, the mice were monitored for tumor-related morbidity and  
149 mortality. The mice were sacrificed before they died of myeloma, when they exhibited  
150 severe wasting or when observations were completed, and the day of sacrifice was  
151 recorded. Collection of human bone marrow specimens from autopsies was generously  
152 permitted by the bereaved families and informed consent was obtained. Animal  
153 experiments were conducted according to the guidelines for animal protection and  
154 protocols approved by the Animal Care and Use Committees at Keio University, School  
155 of Medicine.

156

#### 157 **Side population (SP) cell analysis with Hoechst 33342 staining**

158 The MM cell lines, RPMI8226 and KMS11 in mono-culture or co-culture with OCs were  
159 seeded at  $5 \times 10^5$ /ml for 72 hours in RPMI1640 supplemented with 10% of FBS, ampicillin  
160 and streptomycin. Subsequently, the cells were harvested, washed in pre-warmed IMDM



161 (Life Technologies) containing 2% FBS and 10 mM HEPES and counted. Viability was  
162 evaluated using trypan blue, and only cells with viability of >95% was used for SP cell  
163 staining. First,  $1 \times 10^6$  cells were resuspended in 1ml of buffer with 5  $\mu\text{g}/\text{ml}$  of Hoechst  
164 33342 (Sigma Aldrich, Life Technologies) and the cells were incubated for 90 minutes in  
165 a water bath at  $37^\circ\text{C}$  with shaking every 15 minutes. The cells treated with 50  $\mu\text{mol}/\text{l}$  of  
166 verapamil, an ABC transporter inhibitor, were used as a negative control. After incubation,  
167 the cells were immediately put on ice and washed with buffer. Samples were centrifuged  
168 at 300 g at  $4^\circ\text{C}$  for 5 minutes and were resuspended in ice-cold buffer with 2  $\mu\text{g}/\text{ml}$  of  
169 propidium iodide (PI) solution for cell sorting by MOFLO™ XDP sorter (Beckman  
170 Coulter).

171

## 172 **Supplementary Figure and Legends**

### 173 **Figure S1 Osteoclastogenesis derived from bone marrow (BM) of a MM patient.**

174 (a) Human OC culture was performed with bone marrow mononuclear cells (BM-MNCs)  
175 derived from a multiple myeloma (MM) patient. Microphotographs of cultured cells on  
176 day 1, 3, 5 and 7 of OC development were shown (original magnification, x100). Images  
177 of TRAP+ (red)+ and TRAP+/CD26+ (gray) OCs on day 7 of OC culture are shown  
178 (original magnification, x100).

179 (b) Photomicrographs of TRAP+ OCs on day 7 of human OC culture derived from BM-  
180 MNCs of MM patient in the presence of indicated concentrations of huCD26mAb or iso

181 IgG<sub>1</sub> were shown (original magnification, x100).

182 (c) The number of TRAP<sup>+</sup> multinuclear OCs (>3 nuclei) was quantified. huCD26mAb-  
183 versus iso IgG<sub>1</sub>-treated OC culture was revealed to exhibit decreased osteoclastogenesis  
184 in a dose-dependent manner as shown by significantly lower number of small (3 or 4  
185 nuclei/OC), medium (5-7 nuclei/OC) and large OCs. *Columns*, means  $\pm$  SD; n=3 \*p<.05,  
186 \*\*p<.01.

187 (d) A bone resorption assay was performed in the presence of the indicated concentrations  
188 of huCD26mAb (0.1, 1.0, 10  $\mu$  g/ml) or iso IgG<sub>1</sub>. The effect of huCD26mAb on the bone  
189 resorptive activity in OCs was determined by evaluating fluorescence intensity and pit  
190 area in OCs. *Columns*, means  $\pm$  SD; n=3 \*p<.05, \*\*p<.01. Microphotograph of OCs on  
191 day 14, indicating pit formation was additionally shown.

192

193 **Figure S2 CD26 expression in MM cells co-cultured with OCs without direct contact.**

194 CD26 expression in MM cell lines (U266, KMS18, KMS26, KMS27, KMS28 and  
195 KMS34), placed on 0.45 $\mu$ m pore size transwell inserts in wells containing OCs (co-  
196 culture without direct contact) was increased as well as those co-cultured with OCs with  
197 direct contact by immunohistochemistry (original magnification, x100).

198

199 **Figure S3 Regulation of CD26 expression in MM cells.**

200 Myeloma cell lines (KMS18, KMS26 and KMS28) were cultured under the stimulation

201 with anti-apoptotic cytokines, produced by OCs or BMSCs, derived from the BM  
202 microenvironment of MM. rhIL-6 (10 ng/ml), SDF1 (10 ng/ml), TNF  $\alpha$  (10 ng/ml),  
203 APRIL (100 ng/ml) and BAFF (100 ng/ml), alone as indicated. These cytokines  
204 enhanced CD26 expression in MM cells, as evaluated by flow cytometry.

205

206 **Figure S4 huCD26mAb did not exhibit ADCC against CD26- MM cell lines.**

207 huCD26mAb significantly triggered the lysis of CD26+ MM cell lines co-cultured with  
208 OCs by ADCC (left panel), whereas it did not induce NK cell-dependent ADCC against  
209 CD26- MM cell lines cultured alone (right panel). The data represent the mean  $\pm$  SE of  
210 triplicate wells.
